# Supplementary material for: The Role of Biofilms Developed under Different Anthropogenic Pressure on Recruitment of Macro-Invertebrates
Source: MDPI journal article supplement (doi:10.3390/ijms21062030), 2020-03-16
Supplement: s1 [file s1]

**Table S1.** Pair-wise comparisons performed when significant differences in the univariate and multivariate analyses of variance of bacteria and diatom assemblages across “Pressure” levels (= Pr) after 30 days of panel deployment were found (see Table 2). S: taxonomic richness.

| Groups    | Bacteria         |            | Diatoms          |   |
|-----------|------------------|------------|------------------|---|
|           | Total assemblage | S          | Total assemblage | S |
|           | t, P(perm)       | t, P(perm) | t, P(MC)         |   |
| High, Low | 1.892            | 1.945      | 1.450            |   |
| High, Mid | 1.742            | 4.912*     | 1.857            |   |
| High, MPA | 1.249            | 0.505      | 1.507            |   |
| Low, Mid  | 1.458            | 15.294**   | 1.153            |   |
| Low, MPA  | 1.143            | 3.400      | 0.884            |   |
| Mid, MPA  | 1.581            | 56.003*    | No test          |   |

\* $p < 0.05$ , \*\* $p < 0.01$ , MC = Monte Carlo

**Table S2.** Pair-wise comparisons were performed when significant differences in univariate analyses of variance of macrofouling assemblages across “Pressure” levels (= Pr) after 15 weeks of panel deployment were found (see Table 5). J: Pielou evenness; N: Percentage cover.

| Groups    | J          | N          |
|-----------|------------|------------|
|           | t, P(perm) | t, P(perm) |
| Mid, MPA  | 6.863***   | 1.907      |
| Mid, High | 3.096      | 8.832***   |
| Mid, Low  | 3.575      | 5.540***   |
| MPA, High | 2.208      | 0.916      |
| MPA, Low  | 0.704      | 2.213*     |
| High, Low | 0.491      | 2.758**    |

$p < 0.05$ , \*\*  $p < 0.01$ , \*\*\*  $p < 0.001$ .

**Table S3.** Pair-wise comparisons were performed when significant differences in multivariate analyses of variance of a) total macrofouling assemblage and b) macrofouling assemblage accounting only for non-indigenous species, across “Pressure” levels (Pr), “Origin of biofilm” (Or) and “Sites” (Si(Pr)) after 15 weeks of panel deployment were found (see Table 6).

| a) Macrofouling assemblage                              |           |            | b) NIS assemblage                                         |            |
|---------------------------------------------------------|-----------|------------|-----------------------------------------------------------|------------|
| Term “Pr x Or” for pairs of levels of factor “Pressure” |           |            | Term “Si(Pr) x Or” for pairs of levels of factor “Origin” |            |
|                                                         | Groups    | t, P(MC)   | Groups                                                    | t, P(perm) |
| <b>Within level MPA of factor “Origin”</b>              | Mid, MPA  | 2.173*     | S2-Toralla                                                | 0.882      |
|                                                         | Mid, High | 1.784*     | S3-Museo                                                  | 1.961*     |
|                                                         | Mid, Low  | 3.209**    | S4-Cangas                                                 | 0.552      |
|                                                         | MPA, High | 1.316      | S5-Moaña                                                  | 0.997      |
|                                                         | MPA, Low  | 1.687      | S6-Davila                                                 | 1.685      |
|                                                         | High, Low | 2.188*     | S7-Náutico                                                | 2.644**    |
| Within level Local of factor “Origin”                   | Groups    | t, P(perm) |                                                           |            |
|                                                         | Mid, High | 1.933*     |                                                           |            |
|                                                         | Mid, Low  | 2.672**    |                                                           |            |
| Term “Pr x Or” for pairs of levels of factor “Origin”   | Groups    | t, P(perm) |                                                           |            |
|                                                         | Mid       | MPA, Local | 1.661*                                                    |            |
|                                                         | High      | MPA, Local | 1.730**                                                   |            |

Low MPA, Local 1.888\*

\* $p < 0.05$ , \*\* $p < 0.01$ , MC = Monte Carlo.

**Table S4.** Pair-wise comparisons were performed when significant differences in univariate analysis of variance of non-indigenous (NIS) component of macrofouling assemblage across "Pressure" levels (Pr), "Origin of biofilms" (Or) and Sites (Si(Pr)) after 15 weeks of panel deployment were found (see Table 8). S: taxonomic richness, H': Shannon diversity index.

|                                                           | S-NIS    | H'-NIS   |
|-----------------------------------------------------------|----------|----------|
| Term "Si(Pr) x Or" for pairs of levels of factor "Origin" | t, P(MC) | t, P(MC) |
| Toralla                                                   | 0.88192  | -        |
| Museo                                                     | 0.009 ** | 1        |
| Cangas                                                    | 0.649    | 0.542    |
| Moaña                                                     | 0.528    | 0.747    |
| Davila                                                    | 1.0954   | 0.500    |
| Náutico                                                   | 1.3131   | 3.470**  |

\*\* $p < 0.01$ , MC = Monte Carlo

**Table S5.** Pair-wise comparisons performed after significant differences in univariate analysis of variance of *Tricellaria inopinata* across "Pressure" levels (Pr) after 15 weeks of panel deployment were found (see Table 9).

| <i>Tricellaria inopinata</i> |                    |
|------------------------------|--------------------|
| Term "Pr"                    |                    |
| Groups                       | t, p(MC)           |
| Mid, MPA                     | 3.004              |
| Mid, High                    | 3.946 (P(MC)=0.06) |
| Mid, Low                     | 10.97 **           |
| MPA, High                    | 0.476              |
| MPA, Low                     | 7.312 *            |
| High, Low                    | 1.040              |

\* $p < 0.05$ , \*\* $p < 0.01$ , MC = Monte Carlo

**Table S6.** Pair-wise comparisons performed when significant differences in the univariate analyses of variance of biomass and respiration rates across "Pressure" levels (Pr) after 15 weeks of panel deployment were found (see Table 10).

|           | Biomass    | Respiration rate |
|-----------|------------|------------------|
| Groups    | t, P(perm) | t, P(perm)       |
| MPA, High | 0.963      | 1.177            |
| MPA, Low  | 1.820      | 1.623            |
| MPA, Mid  | 2.008      | 1.464            |
| High, Low | 1.799      | 0.531            |
| High, Mid | 10.255**   | 5.860***         |
| Low, Mid  | 5.531*     | 5.257***         |

\* $p < 0.05$ , \*\* $p < 0.01$ , \*\*\* $p < 0.001$
